# Supplementary material for: miR-146a and miR-146b promote proliferation, migration and invasion of follicular thyroid carcinoma via inhibition of ST8SIA4
Source: PubMed Central journal article supplement (PMC5438628; doi:10.18632/oncotarget.15885), 2017-03-03
Supplement: oncotarget-08-28028-s001.pdf [file oncotarget-08-28028-s001.pdf]

## miR-146a and miR-146b promote proliferation, migration and invasion of follicular thyroid carcinoma via inhibition of ST8SIA4

### Supplementary Materials

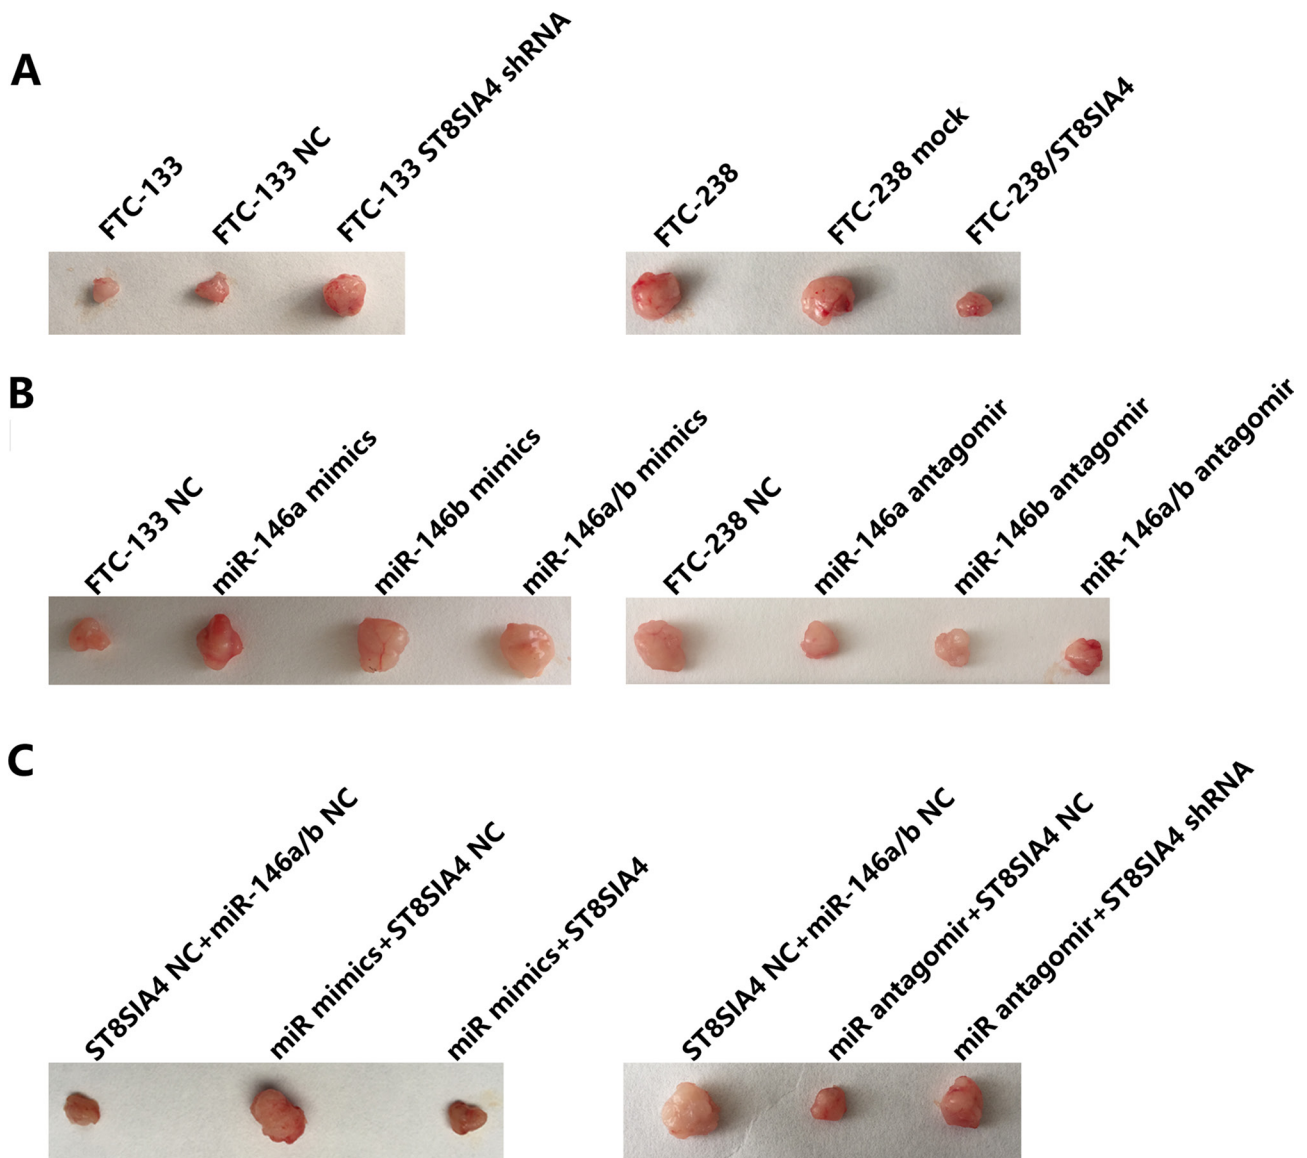

**Supplementary Figure 1: Tumours after transplantation, related to Figures 2, 4 and 5. (A) (B) (C)** Transfected cells were injected subcutaneously into nude mice; representative photograph of xenograft tumours ( $*p < 0.05$ )
